# Supplementary material for: Early puberty in 11-year-old girls: Millennium Cohort Study findings
Source: PubMed Central journal article supplement (PMC5339561; doi:10.1136/archdischild-2016-310475), 2016-09-26
Supplement: archdischild-2016-310475supp_tables.pdf [file archdischild-2016-310475supp_tables.pdf]

**Appendix Table 1. Income distribution by ethnicity (%)**

|                              | White | Indian | Pakistani | Bangladeshi | Black<br>Caribbean | Black<br>African | Other |
|------------------------------|-------|--------|-----------|-------------|--------------------|------------------|-------|
| Equivalised household income |       |        |           |             |                    |                  |       |
| Lowest quintile              | 13.4  | 16.7   | 47.8      | 55.5        | 37.0               | 40.1             | 21.1  |
| Second quintile              | 17.1  | 18.6   | 32.5      | 24.9        | 20.2               | 21.2             | 19.1  |
| Third quintile               | 21.5  | 13.0   | 8.9       | 12.8        | 11.5               | 16.2             | 13.7  |
| Fourth quintile              | 22.7  | 24.8   | 2.8       | 0.5         | 17.7               | 9.9              | 18.7  |
| Highest quintile             | 25.4  | 26.9   | 8.0       | 6.3         | 13.5               | 12.5             | 27.4  |

Notes. Sample size is 5,839. Percents are weighted by overall sample weights.

**Appendix Table 2. Odds ratios (95% CI) for menstruation by income and ethnicity (n=5839)**

|                                    | Model 0: age             | Model 1: age,<br>income,<br>ethnicity | Model 2:<br>Model 1 +<br>Birthweight | Model 3:<br>Model 1 + FMI | Model 4:<br>Model 1 +<br>psychosocial<br>stressors | Model 5: Fully<br>adjusted |
|------------------------------------|--------------------------|---------------------------------------|--------------------------------------|---------------------------|----------------------------------------------------|----------------------------|
| Income (ref.: Richest quintile)    |                          |                                       |                                      |                           |                                                    |                            |
| Fourth                             | 1.02<br>(0.70 - 1.50)    | 1.03<br>(0.70 - 1.51)                 | 1.02<br>(0.70 - 1.50)                | 1.01<br>(0.68 - 1.48)     | 0.99<br>(0.67 - 1.45)                              | 0.97<br>(0.65 - 1.43)      |
| Third                              | 1.27<br>(0.90 - 1.80)    | 1.29<br>(0.91 - 1.83)                 | 1.28<br>(0.91 - 1.82)                | 1.27<br>(0.90 - 1.79)     | 1.21<br>(0.85 - 1.73)                              | 1.18<br>(0.83 - 1.68)      |
| Second                             | 1.92***<br>(1.36 - 2.70) | 1.86***<br>(1.32 - 2.61)              | 1.82***<br>(1.29 - 2.55)             | 1.77**<br>(1.26 - 2.49)   | 1.64**<br>(1.16 - 2.33)                            | 1.55*<br>(1.09 - 2.20)     |
| Poorest                            | 2.14***<br>(1.52 - 2.99) | 1.95***<br>(1.37 - 2.78)              | 1.89***<br>(1.33 - 2.69)             | 1.91***<br>(1.33 - 2.73)  | 1.60*<br>(1.08 - 2.38)                             | 1.56*<br>(1.04 - 2.34)     |
| Ethnicity (ref.: White)            |                          |                                       |                                      |                           |                                                    |                            |
| Indian                             | 3.53***<br>(2.15 - 5.80) | 3.55***<br>(2.20 - 5.71)              | 3.26***<br>(2.05 - 5.21)             | 3.92***<br>(2.44 - 6.29)  | 3.69***<br>(2.28 - 5.97)                           | 3.58***<br>(2.25 - 5.71)   |
| Pakistani                          | 1.87**<br>(1.23 - 2.85)  | 1.43<br>(0.94 - 2.18)                 | 1.35<br>(0.88 - 2.07)                | 1.60*<br>(1.03 - 2.49)    | 1.39<br>(0.91 - 2.15)                              | 1.42<br>(0.90 - 2.25)      |
| Bangladeshi                        | 3.27***<br>(2.15 - 4.98) | 2.45***<br>(1.57 - 3.83)              | 2.24***<br>(1.44 - 3.48)             | 2.31***<br>(1.43 - 3.72)  | 2.54***<br>(1.61 - 4.00)                           | 2.07**<br>(1.28 - 3.35)    |
| Black Caribbean                    | 1.62<br>(0.85 - 3.06)    | 1.39<br>(0.74 - 2.62)                 | 1.34<br>(0.71 - 2.54)                | 1.12<br>(0.55 - 2.26)     | 1.32<br>(0.69 - 2.49)                              | 0.99<br>(0.47 - 2.08)      |
| Black African                      | 3.00***<br>(1.62 - 5.57) | 2.53**<br>(1.31 - 4.88)               | 2.50**<br>(1.31 - 4.78)              | 1.65<br>(0.87 - 3.11)     | 2.58**<br>(1.34 - 4.96)                            | 1.61<br>(0.88 - 2.97)      |
| Other                              | 1.93*<br>(1.02 - 3.65)   | 1.85<br>(0.98 - 3.51)                 | 1.82<br>(0.95 - 3.50)                | 2.00*<br>(1.02 - 3.92)    | 1.88<br>(0.98 - 3.62)                              | 1.98<br>(0.98 - 4.02)      |
| Age (in years and centred at mean) | 4.73***                  | 4.98***                               | 4.87***                              | 4.90***                   | 5.02***                                            | 4.65***                    |

|                                         |               |               |               |               |               |               |               |
|-----------------------------------------|---------------|---------------|---------------|---------------|---------------|---------------|---------------|
| Birthweight (kg)                        | (3.52 - 6.36) | (3.69 - 6.73) | (3.61 - 6.57) | (3.62 - 6.65) | (3.31 - 6.20) | (3.72 - 6.76) | (3.38 - 6.39) |
|                                         |               |               |               | 0.78**        |               |               | 0.69***       |
|                                         |               |               |               | (0.64 - 0.93) |               |               | (0.57 - 0.83) |
| FMI (kg/m <sup>2</sup> )                |               |               |               |               | 1.31***       |               | 1.33***       |
|                                         |               |               |               |               | (1.24 - 1.39) |               | (1.26 - 1.42) |
| Mother's<br>psychological distress      |               |               |               |               |               | 1.00          | 1.01          |
|                                         |               |               |               |               |               | (0.97 - 1.04) | (0.97 - 1.04) |
| Racism in area is<br>fairly/very common |               |               |               |               |               | 1.16          | 1.02          |
|                                         |               |               |               |               |               | (0.79 - 1.71) | (0.68 - 1.53) |
| Lone parent family                      |               |               |               |               |               | 1.15          | 1.07          |
|                                         |               |               |               |               |               | (0.87 - 1.53) | (0.80 - 1.44) |
| Total difficulties score                |               |               |               |               |               | 1.03**        | 1.03*         |
|                                         |               |               |               |               |               | (1.01 - 1.05) | (1.00 - 1.05) |

---

Notes: All estimates are weighted with overall survey weights.

\*\*\* p<0.001, \*\* p<0.01, \* p<0.05
